# Supplementary material
Source: PubMed Central journal article supplement (PMC4407863)
Supplement: supp_db14-0988_DB140988SupplementaryData.pdf [file supp_db14-0988_DB140988SupplementaryData.pdf]

SUPPLEMENTARY DATA

**Age- and sex-specific causal effects of adiposity on cardiovascular risk factors**

Fall *et al.*

**Supplementary Table 1.** Description of the participating studies

| Study        | Full name                                                                                                         | Ethnicity                            | Country (Sample source)                                                  | Webpage                                                                                                                                                 |
|--------------|-------------------------------------------------------------------------------------------------------------------|--------------------------------------|--------------------------------------------------------------------------|---------------------------------------------------------------------------------------------------------------------------------------------------------|
| B58C         | British 1958 Birth Cohort                                                                                         | White European                       | UK                                                                       | <a href="http://www.b58cgene.sgul.ac.uk/">http://www.b58cgene.sgul.ac.uk/</a>                                                                           |
| EGCUT_metabo | Estonian Genome Centre of the University of Tartu - Metabochip genotyping                                         | Northern European (White, Caucasian) | Estonia                                                                  | <a href="http://www.biobank.ee">www.biobank.ee</a>                                                                                                      |
| EGCUT_omni   | Estonian Genome Centre of the University of Tartu - Omni genotyping                                               | Northern European (White, Caucasian) | Estonia                                                                  | <a href="http://www.biobank.ee">www.biobank.ee</a>                                                                                                      |
| FTC          | FINNISH TWIN COHORT/Nicotine addiction families                                                                   | Northern European (White, Caucasian) | Finland                                                                  |                                                                                                                                                         |
| FR92         | FINRISK 1992                                                                                                      | Northern European (White, Caucasian) | Finland                                                                  | Vartiainen E et al., Thirty-five-year trends in cardiovascular risk factors in Finland. <i>Int J Epidemiol.</i> 2010 Apr;39(2):504-18                   |
| FR97         | FINRISK 1997                                                                                                      | Northern European (White, Caucasian) | Finland                                                                  | Vartiainen E et al., Thirty-five-year trends in cardiovascular risk factors in Finland. <i>Int J Epidemiol.</i> 2010 Apr;39(2):504-18                   |
| FR02         | FINRISK 2002                                                                                                      | Northern European (White, Caucasian) | Finland                                                                  | Vartiainen E et al., Thirty-five-year trends in cardiovascular risk factors in Finland. <i>Int J Epidemiol.</i> 2010 Apr;39(2):504-18                   |
| FR07         | FINRISK 2007                                                                                                      | Northern European (White, Caucasian) | Finland                                                                  | Vartiainen E et al., Thirty-five-year trends in cardiovascular risk factors in Finland. <i>Int J Epidemiol.</i> 2010 Apr;39(2):504-18                   |
| GOSH         | Gender, Octo, SATSA, Harmony (Swedish Twin Register)                                                              | Northern European (White, Caucasian) | Sweden                                                                   | <a href="http://ki.se/ki/jsp/polopoly.jsp?l=en&amp;d=9610">http://ki.se/ki/jsp/polopoly.jsp?l=en&amp;d=9610</a>                                         |
| GRAPHIC      | Genetic Regulation of Arterial Pressure of Humans in the Community                                                | White British                        | England                                                                  |                                                                                                                                                         |
| H2000        | Finnish Health survey 2000                                                                                        | Northern European (White, Caucasian) | Finland                                                                  | <a href="http://www.terveys2000.fi/indexe.html">www.terveys2000.fi/indexe.html</a>                                                                      |
| HELENA       | HELENA                                                                                                            | European                             | Greece, Germany, Belgium, France, Hungary, Italy, Sweden, Austria, Spain | <a href="http://www.helenastudy.com/">http://www.helenastudy.com/</a>                                                                                   |
| KORA F3      | Cooperative Health Research in the Region of Augsburg, KOperative Gesundheitsforschung in der Region Augsburg, F3 | European (White, Caucasian)          | Germany                                                                  | <a href="http://www.helmholtz-muenchen.de/en/kora-en/kora-homepage/index.html">http://www.helmholtz-muenchen.de/en/kora-en/kora-homepage/index.html</a> |
| KORA F4      | Cooperative Health Research in the Region of Augsburg, KOperative Gesundheitsforschung in der Region              | European (White, Caucasian)          | Germany                                                                  | <a href="http://www.helmholtz-muenchen.de/en/kora-en/kora-homepage/index.html">http://www.helmholtz-muenchen.de/en/kora-en/kora-homepage/index.html</a> |

## SUPPLEMENTARY DATA

|                     |                                                                                                          |                                      |                                            |                                                                                                                                                                                                                                                           |
|---------------------|----------------------------------------------------------------------------------------------------------|--------------------------------------|--------------------------------------------|-----------------------------------------------------------------------------------------------------------------------------------------------------------------------------------------------------------------------------------------------------------|
|                     | Augsburg , F4                                                                                            |                                      |                                            |                                                                                                                                                                                                                                                           |
| MONA LISA           | MONA LISA LILLE                                                                                          | French (Caucasian)                   | French                                     |                                                                                                                                                                                                                                                           |
| MONICA              | MONICA LILLE                                                                                             | French (Caucasian)                   | French                                     | <a href="http://www.thl.fi/monica/">http://www.thl.fi/monica/</a>                                                                                                                                                                                         |
| MORGAM <sup>1</sup> | Monitoring of trends and determinants in Cardiovascular disease, Risk, Genetics, Archiving and Monograph | European White                       | Finland, Italy, France, UK (North Ireland) | <a href="http://www.thl.fi/morgam">www.thl.fi/morgam</a>                                                                                                                                                                                                  |
| MPP                 | Malmö Prevention Project                                                                                 | Northern European (White, Caucasian) | Sweden                                     | <a href="http://www.ludc.med.lu.se/research-units/diabetes-and-endocrinology/sample-collections/malmoe-prevention-project-mpp/">http://www.ludc.med.lu.se/research-units/diabetes-and-endocrinology/sample-collections/malmoe-prevention-project-mpp/</a> |
| NESDA               | Netherlands Study of Depression and Anxiety                                                              | Northern European (White, Caucasian) | Netherlands                                | <a href="http://www.nesda.nl/en/">http://www.nesda.nl/en/</a>                                                                                                                                                                                             |
| NFBC1966            | Northern Finland Birth Cohort 1966                                                                       | Northern European (White, Caucasian) | Finland                                    | <a href="http://kelo.oulu.fi/NFBC/">http://kelo.oulu.fi/NFBC/</a>                                                                                                                                                                                         |
| NFBC1986            | Northern Finland Birth Cohort 1986                                                                       | Northern European (White, Caucasian) | Finland                                    | <a href="http://kelo.oulu.fi/NFBC/">http://kelo.oulu.fi/NFBC/</a>                                                                                                                                                                                         |
| NTR                 | Netherlands Twin Register                                                                                | Northern European (White, Caucasian) | Netherlands                                | <a href="http://www.tweelingenregister.org">www.tweelingenregister.org</a>                                                                                                                                                                                |
| PIVUS               | Prospective Investigation of the Vasculature in Uppsala Seniors                                          | Northern European (White, Caucasian) | Sweden                                     | <a href="http://www.medsci.uu.se/pivus/pivus.htm">http://www.medsci.uu.se/pivus/pivus.htm</a>                                                                                                                                                             |
| PPP                 | Prevalence, Prediction and Prevention of diabetes                                                        | Northern European (White, Caucasian) | Finland                                    | <a href="http://www.botnia-study.org">http://www.botnia-study.org</a>                                                                                                                                                                                     |
| QIMR-AUSTRALIA      | Twin and family studies at the Queensland Institute of Medical Research                                  | European                             | Australia                                  | <a href="http://genepi.qimr.edu.au/">http://genepi.qimr.edu.au/</a>                                                                                                                                                                                       |
| RS                  | Rotterdam Study                                                                                          | European (White, Caucasian)          | Netherlands                                | <a href="http://www.epib.nl/research/ergo.htm">http://www.epib.nl/research/ergo.htm</a>                                                                                                                                                                   |
| TWINGENE            | TWINGENE                                                                                                 | Northern European (White, Caucasian) | Sweden                                     | <a href="http://ki.se/ki/jsp/polopoly.jsp?l=en&amp;d=9610">http://ki.se/ki/jsp/polopoly.jsp?l=en&amp;d=9610</a>                                                                                                                                           |
| TwinsUK             | TwinsUK                                                                                                  | White, Caucasian (UK)                | United Kingdom                             | <a href="http://www.twinsuk.ac.uk/">http://www.twinsuk.ac.uk/</a>                                                                                                                                                                                         |
| ULSAM               | Uppsala longitudinal study of adult men                                                                  | Northern European (White, Caucasian) | Sweden                                     | <a href="http://www.pubcare.uu.se/ULSAM">http://www.pubcare.uu.se/ULSAM</a>                                                                                                                                                                               |
| WTCCC-CAD           | Wellcome Trust Case Control Consortium CAD Cases                                                         | White British                        | England                                    | <a href="http://www.wtccc.org.uk">www.wtccc.org.uk</a>                                                                                                                                                                                                    |

<sup>1</sup>The MORGAM cohort (Monitoring of trends and determinants in Cardiovascular disease, Risk, Genetics, Archiving and Monograph) is a consortium of cohort studies, whose data have been harmonized into one database for joint analysis<sup>1</sup>. For the current analysis, MORGAM includes the following cohorts: Brianza 01, 02 and 03 (Italy); the placebo cohort of the ATBC Study (Finland); Lille, Strasbourg and Toulouse cohorts of the PRIME study (France); and Belfast cohort of the PRIME study (Northern Ireland). The analyses performed in MORGAM used the cohort as covariate to reduce possible cohort specific confounding.

SUPPLEMENTARY DATA

**Supplementary Table 2.** Age, sex and body mass index of the participating cohorts

| <b>Study</b>   | <b>Age (years) at measurement: mean (SD)</b> | <b>Sex: N men / N women</b> | <b>BMI (kg/m<sup>2</sup>): mean (SD)</b> |
|----------------|----------------------------------------------|-----------------------------|------------------------------------------|
| B58C           | 45.16 (0.39)                                 | 3,226/3,255                 | 27.39 (4.88)                             |
| EGCUT_metabo   | 58.43 (11.45)                                | 868 / 1,402                 | 28.07 (6.47)                             |
| EGCUT_omni     | 48.98 (20.17)                                | 4,591 / 5,255               | 26.53 (5.28)                             |
| FTC            | 55.01 (4.43)                                 | 686/423                     | 26.09 (4.07)                             |
| FR92           | 44.39 (11.32)                                | 2,552 / 2,984               | 26.13 (4.46)                             |
| FR97           | 47.79 (13.22)                                | 3,150 / 3,598               | 26.63 (4.61)                             |
| FR02           | 47.96 (13.12)                                | 3,800 / 4,342               | 26.91 (4.68)                             |
| FR07           | 50.45 (13.93)                                | 2,753 / 3,147               | 27.13 (4.88)                             |
| GOSH           | 54.1(11.8)                                   | 756/741                     | 24.5 (3.2)                               |
| GRAPHIC        | 39.29 (14.5)                                 | 1,021/1,003                 | 26.11 (4.6)                              |
| H2000          | 56.21 (17.19)                                | 1,501 / 1,979               | 26.81 (4.68)                             |
| HELENA         | 14.7 (1.4)                                   | 549/595                     | 21.3 (3.8)                               |
| KORA F3        | 56.92 (12.76)                                | 1,419/1,557                 | 27.61 (4.62)                             |
| KORA F4        | 56.08 (13.26)                                | 1,459/1,550                 | 27.62 (4.81)                             |
| MONA LISA      | 55.4 (11.4)                                  | 772/771                     | 27.0 (5.0)                               |
| MONICA         | 51.2 (8.4)                                   | 582/567                     | 26.6 (5.0)                               |
| MORGAM         | 58.03 (8.54)                                 | 5,448/1,087                 | 27.21 (4.22)                             |
| MPP            | 45.5 (6.90)                                  | 10,294 / 5,571              | 24.25 (3.29)                             |
| NESDA          | 42.07 (12.83)                                | 745 / 1,489                 | 25.64 (5.03)                             |
| NFBC1966       | 31.17 (0.35)                                 | 2,137 / 2,298               | 24.70 (4.28)                             |
| NFBC1986       | 16.00 (0.37)                                 | 2,591 / 2,694               | 21.22 (3.48)                             |
| NTR            | 41.87 (15.09)                                | 2,599 / 4,155               | 24.67 (4.09)                             |
| PIVUS          | 70.19 (0.17)                                 | 491/488                     | 27.07 (4.3)                              |
| PPP            | 47.90 (15.63)                                | 2,017 / 2,349               | 26.31 (4.44)                             |
| QIMR-AUSTRALIA | 35.61 (17.42)                                | 5,059/6,737                 | 24.11 (5.12)                             |
| RS             | 69.0 (8.80)                                  | 2,372/3,373                 | 26.3 (3.69)                              |
| TWINGENE       | 65.4(8.3)                                    | 3,021/2,470                 | 26.2(4.2)                                |
| TwinsUK        | 52.80 (14.42)                                | 0/4,829                     | 26.06 (5.06)                             |

SUPPLEMENTARY DATA

|           |             |           |             |
|-----------|-------------|-----------|-------------|
| ULSAM     | 49.6 (0.6)  | 1,175/ 0  | 24.8 (3.0)  |
| WTCCC-CAD | 51.27 (8.7) | 2,376/590 | 28.02 (4.5) |

SUPPLEMENTARY DATA

**Supplementary Table 3.** Lead SNPs and proxy SNPs used to create the genetic score instrument. All lead SNPs were available (genotyped or imputed) in studies B58C, EGCUTomni, FR02, FR07, FR92, FR97, H2000, QIMR-AUSTRALIA, RS and WTCCC-CAD, and these studies are not included in the table.

| Lead SNP       |                     |    | Proxies used |                |           | Studies                 |     |      |             |            |                |            |       |                  |                  |         |           |               |             |           |
|----------------|---------------------|----|--------------|----------------|-----------|-------------------------|-----|------|-------------|------------|----------------|------------|-------|------------------|------------------|---------|-----------|---------------|-------------|-----------|
| SNP id         | Locus               | EA | Proxy 1      | Proxy 2        | Proxy 3   | EGC<br>UT<br>metab<br>o | FTC | GOSH | GRAPH<br>IC | KORA<br>F3 | KOR<br>A<br>F4 | MOR<br>GAM | NESDA | NFB<br>C<br>1966 | NFB<br>C<br>1986 | NT<br>R | PIVU<br>S | TWIN-<br>GENE | TwinsU<br>K | ULSA<br>M |
| rs4836133      | <i>ZNF608</i>       | A  | rs6864049    |                |           | 1                       |     | 1    | 1           | 1          | 1              | 1          | 1     | 1                | 1                | 1       | 1         | 1             | 1           | 1         |
| rs4929949      | <i>RPL27A</i>       | C  | rs7127684    | rs9300091      |           | 1                       |     |      | 2           | 1          | 1              | 1          |       |                  | 1                |         | 2         | 2             | 2           | 2         |
| rs4771122      | <i>MTIF3</i>        | G  | rs1006353    | rs1201687<br>1 | rs4771122 | 1                       | 3   |      | 2           | 1          | 1              | 1          |       |                  | 1                |         | 2         | 2             |             | 2         |
| rs713586       | <i>RBJ</i>          | C  | rs10182181   | rs713587       | rs6752378 | 3                       |     | 1    | 2           | 1          | 1              | 1          |       |                  | 1                |         | 2         | 2             |             | 2         |
| rs1076766<br>4 | <i>BDNF</i>         | A  | rs2030323    | rs988748       |           | 1                       |     | 1    | 2           | 1          | 1              | 1          |       |                  | 1                |         | 2         | 2             |             | 2         |
| rs1015033<br>2 | <i>NRXN3</i>        | C  | rs17109256   | rs7144011      |           | 1                       |     |      | 1           | 1          | 1              | 2          |       |                  | 1                |         | 1         | 1             |             | 1         |
| rs1555543      | <i>PTBP2</i>        | C  | rs11165643   | rs1048974<br>1 |           | 1                       |     |      | 2           | 1          | 1              | 1          |       |                  | 1                |         | 1         | 1             |             | 1         |
| rs1558902      | <i>FTO</i>          | A  | rs1421085    | rs1107598<br>9 |           | 1                       |     |      | 1           | 1          | 1              | 2          |       |                  | 1                |         | 1         | 1             |             | 1         |
| rs2890652      | <i>LRP1B</i>        | C  |              |                |           | NA                      |     |      |             | NA         | NA             |            |       |                  | NA               |         | NA        | NA            |             | NA        |
| rs887912       | <i>FANCL</i>        | T  | rs1016287    | rs759250       |           |                         |     |      | 1           |            |                |            | 1     |                  |                  | 1       | 1         | 1             | 2           | 1         |
| rs9816226      | <i>ETV5</i>         | T  |              |                |           | NA                      |     |      |             | NA         | NA             |            |       |                  | NA               |         | NA        | NA            |             | NA        |
| rs1184769<br>7 | <i>PRKD1</i>        | T  |              |                |           | NA                      |     |      |             | NA         | NA             |            |       |                  | NA               |         | NA        | NA            |             | NA        |
| rs7359397      | <i>SH2B1</i>        | T  | rs3888190    | rs7498665      | rs4788102 |                         |     |      | 3           |            |                |            | 2     |                  |                  | 2       | 1         | 1             |             | 1         |
| rs29941        | <i>KCTD15</i>       | G  | rs29942      |                |           |                         |     |      | 1           |            |                |            |       |                  |                  |         | 1         | 1             |             | 1         |
| rs2112347      | <i>FLJ35779</i>     | T  | rs10057967   |                |           |                         |     |      | 1           |            |                |            |       |                  |                  |         | 1         | 1             |             | 1         |
| rs3817334      | <i>MTCH2</i>        | T  | rs4752856    |                |           |                         |     |      | 1           |            |                |            |       |                  |                  |         | 1         | 1             |             | 1         |
| rs3810291      | <i>TMEM16<br/>0</i> | A  | rs2303108    | rs1040816<br>3 |           | 2                       |     | 1    |             |            |                | 1          |       |                  |                  |         |           |               |             |           |
| rs1514175      | <i>TNNI3K</i>       | A  | rs3845344    |                |           |                         |     |      |             |            |                |            | 1     |                  |                  | 1       |           |               |             |           |
| rs1093839<br>7 | <i>GNPDA2</i>       | G  | rs12641981   |                |           |                         |     |      | 1           |            |                |            |       |                  | 1                |         |           |               |             |           |
| rs2241423      | <i>MAP2K5</i>       | G  | rs16951304   |                |           |                         |     |      |             |            |                |            | 1     |                  |                  | 1       |           |               |             |           |
| rs1307880<br>7 | <i>CADM2</i>        | G  | rs9852859    |                |           |                         |     |      | 1           |            |                |            |       |                  |                  |         |           |               |             |           |
| rs2287019      | <i>QPCTL</i>        | C  |              |                |           |                         |     |      |             |            |                |            |       |                  |                  |         |           |               |             |           |

SUPPLEMENTARY DATA

|                |                |   |  |  |  |  |  |  |  |  |  |  |  |  |  |  |  |  |  |  |
|----------------|----------------|---|--|--|--|--|--|--|--|--|--|--|--|--|--|--|--|--|--|--|
| rs543874       | <i>SEC16B</i>  | G |  |  |  |  |  |  |  |  |  |  |  |  |  |  |  |  |  |  |
| rs2815752      | <i>NEGR1</i>   | A |  |  |  |  |  |  |  |  |  |  |  |  |  |  |  |  |  |  |
| rs7138803      | <i>FAIM2</i>   | A |  |  |  |  |  |  |  |  |  |  |  |  |  |  |  |  |  |  |
| rs571312       | <i>MC4R</i>    | A |  |  |  |  |  |  |  |  |  |  |  |  |  |  |  |  |  |  |
| rs1244497<br>9 | <i>GPRC5B</i>  | C |  |  |  |  |  |  |  |  |  |  |  |  |  |  |  |  |  |  |
| rs1096857<br>6 | <i>LRRN6C</i>  | G |  |  |  |  |  |  |  |  |  |  |  |  |  |  |  |  |  |  |
| rs2867125      | <i>TMEM18</i>  | C |  |  |  |  |  |  |  |  |  |  |  |  |  |  |  |  |  |  |
| rs206936       | <i>NUDT3</i>   | G |  |  |  |  |  |  |  |  |  |  |  |  |  |  |  |  |  |  |
| rs1310732<br>5 | <i>SLC39A8</i> | T |  |  |  |  |  |  |  |  |  |  |  |  |  |  |  |  |  |  |
| rs987237       | <i>TFAP2B</i>  | G |  |  |  |  |  |  |  |  |  |  |  |  |  |  |  |  |  |  |

EA, effect allele

SUPPLEMENTARY DATA

**Supplementary Table 4.** Measurement methods used for glycemc traits

| Study        | Glucose                                                                                                             | Insulin                                                                                                                                                      | HbA1c                                                                        |
|--------------|---------------------------------------------------------------------------------------------------------------------|--------------------------------------------------------------------------------------------------------------------------------------------------------------|------------------------------------------------------------------------------|
| B58C         | NA                                                                                                                  | NA                                                                                                                                                           | Ion exchange HPLC using the TOSOH A1c2.2 analyser                            |
| EGCUT_metabo | NA                                                                                                                  | NA                                                                                                                                                           | NA                                                                           |
| EGCUT_omni   | NA                                                                                                                  | NA                                                                                                                                                           | NA                                                                           |
| FTC          | NA                                                                                                                  | NA                                                                                                                                                           | NA                                                                           |
| FR92         | NA                                                                                                                  | NA                                                                                                                                                           | NA                                                                           |
| FR97         | NA                                                                                                                  | NA                                                                                                                                                           | NA                                                                           |
| FR02         | NA                                                                                                                  | NA                                                                                                                                                           | NA                                                                           |
| FR07         | Enzymatic, hexokinase (fasting time >= 8 hours)                                                                     | CMIA, Chemiluminescent Microparticle Immuno Assay (measured from serum)                                                                                      | NA                                                                           |
| GOSH         | Reference method at Karolinska Institutet                                                                           | Reference method at Karolinska Institutet                                                                                                                    | Reference method at Karolinska Institutet                                    |
| GRAPHIC      | NA                                                                                                                  | NA                                                                                                                                                           | NA                                                                           |
| H2000        | Glucose, Hexokinase (4-11 hour fasting time)                                                                        | Microparticle enzyme immunoassay (4-11 hour fasting time)                                                                                                    | NA                                                                           |
| HELENA       | Enzyme assays on the Dimension RxL clinical chemistry system (Dade Behring, Schwalbach, Germany) .                  | Insulin was measured by a solid-phase two-site chemiluminescent immunometric assay with an Immulite 2000 analyzer (DPC Biermann GmbH, Bad Nauheim, Germany). | NA                                                                           |
| KORA F3      | GLU Flex (Dade Behring); Hexokinase/G6P-DH                                                                          | NA                                                                                                                                                           | turbidimetric immunologic inhibition assay (TINIA; HA1C Kit Dade Behring)    |
| KORA F4      | GLU Flex (Dade Behring); Hexokinase/G6P-DH                                                                          | ELISA                                                                                                                                                        | HPLC (Menarini HA-8160)                                                      |
| MONA LISA    | Glucose was measured using the standard glucose hexokinase method (DuPont Dimension, Brussels, Belgium).            | Plasma insulin was measured with an enzyme immunoassay (Beckman Coulter) or an immunoradiometric assay (Immunotech) .                                        | HbA1c was measured by HPLC (ChromSystems, Munich, Germany).                  |
| MONICA       | Plasma glucose was measured using the standard glucose hexokinase method (DuPont Dimension, Brussels, Belgium).     | Plasma insulin was measured by radio-immunoassay (Medgenix Diagnostics, Brussels, Belgium).                                                                  | NA                                                                           |
| MORGAM       | NA                                                                                                                  | NA                                                                                                                                                           | NA                                                                           |
| MPP          | Hexokinase method (routine methods at the Department of Clinical Chemistry, University Hospital)                    |                                                                                                                                                              | Routine methods at the Department of Clinical Chemistry, University Hospital |
| NESDA        | Hexokinase method (Gluco-quant) (Modular analytics, Roche diagnostics, Mannheim, Germany)                           | NA                                                                                                                                                           | NA                                                                           |
| NFBC1966     | Blood glucose was analysed by a glucose dehydrogenase method (Granutest 250, Diagnostica Merck, Darmstadt, Germany) | Serum insulin was analysed by RIA (Pharmacia Diagnostics, Uppsala, Sweden)                                                                                   | NA                                                                           |
| NFBC1986     | Plasma glucose concentrations were analysed by                                                                      | Serum insulin was determined by radioimmunoassay                                                                                                             | NA                                                                           |

SUPPLEMENTARY DATA

|                |                                                                                                                                                  |                                                                                                             |                                                                               |
|----------------|--------------------------------------------------------------------------------------------------------------------------------------------------|-------------------------------------------------------------------------------------------------------------|-------------------------------------------------------------------------------|
|                | Cobas Integra 700 automatic analyser (Roche Diagnostics, Basel, Switzerland)                                                                     | (Pharmacia Diagnostics, Uppsala, Sweden)                                                                    |                                                                               |
| NTR            | Vitros 250 Glucose assay (Johnson & Johnson, Rochester, USA; measured in heparin plasma)                                                         | Immulite 1000 Insulin Method (Diagnostic Product Corporation, Los Angeles, USA; measured in heparin plasma) | Nyocard HbA1c assay (Axis-Shield, Oslo, Norway; measured in EDTA whole blood) |
| PIVUS          | Reference method at Uppsala University Hospital                                                                                                  | Enzymatic-immunological assay at Uppsala University Hospital                                                | NA                                                                            |
| PPP            | Glucose dehydrogenase method (Hemocue, Ängelholm, Sweden)                                                                                        | Serum insulin by fluoroimmunoassay (Delfia, Perkin Elmer, Turku, Finland)                                   | Local laboratories                                                            |
| QIMR-AUSTRALIA | NA                                                                                                                                               | NA                                                                                                          | NA                                                                            |
| RS             | Glucose levels were measured using the glucose hexokinase method (Instruchemie)                                                                  | Serum insulin was determined by metric assay (Biosource Diagnostics, Camarillo, CA, USA).                   | NA                                                                            |
| TWINGENE       | Reference method at Karolinska Institutet                                                                                                        | NA                                                                                                          | Reference method at Karolinska Institutet                                     |
| TwinsUK        | Ektachem 700 multichannel analyzer using an enzymatic colorimetric slide assay (Johnson and Johnson Clinical Diagnostic Systems, Amersham, U.K.) | immunoassay (Abbott Laboratories, Maidenhead, U.K.)                                                         | NA                                                                            |
| ULSAM          | Glucose dehydrogenase method (Gluc-DH, Merck, Darmstadt, Germany)                                                                                | Immunoreactive insulin: Enzymatic-immunological assay (Enzymun, Boehringer Mannheim)                        | HPLC with gradient system (BIO-RAD Laboratories)                              |
| WTCCC-CAD      | NA                                                                                                                                               | NA                                                                                                          | NA                                                                            |



SUPPLEMENTARY DATA

**Supplementary Table 5.** Measurement methods used for lipids

| Study        | HDL-C                                                                                                                                                                                                                                       | LDL-C                                                                                            | Triglycerides                                                                                    | Total cholesterol                                                                                                                                 |
|--------------|---------------------------------------------------------------------------------------------------------------------------------------------------------------------------------------------------------------------------------------------|--------------------------------------------------------------------------------------------------|--------------------------------------------------------------------------------------------------|---------------------------------------------------------------------------------------------------------------------------------------------------|
| B58C         | Abbott AU2700 autoanalyser                                                                                                                                                                                                                  | Estimated by Friedewald's formula                                                                | Abbott AU2700 autoanalyser                                                                       | Abbott AU2700 autoanalyser                                                                                                                        |
| EGCUT_metabo | NA                                                                                                                                                                                                                                          | NA                                                                                               | NA                                                                                               | NA                                                                                                                                                |
| EGCUT_omni   | NA                                                                                                                                                                                                                                          | NA                                                                                               | NA                                                                                               | NA                                                                                                                                                |
| FTC          |                                                                                                                                                                                                                                             |                                                                                                  |                                                                                                  |                                                                                                                                                   |
| FR92         | Dextran-MgCl <sub>2</sub> precipitation (average 4-hour fasting time)                                                                                                                                                                       | LDL cholesterol was calculated using Friedewald's formula. Average 4-hour fasting time.          | Enzymatic, GPO-PAP (average 4-hour fasting time)                                                 | Enzymatic, CHOD-PAP, (average 4-hour fasting time)                                                                                                |
| FR97         | Dextran-MgCl <sub>2</sub> precipitation (average 4-hour fasting time)                                                                                                                                                                       | LDL cholesterol was calculated using Friedewald's formula, Average 4-hour fasting time.          | Enzymatic, GPO-PAP (average 4-hour fasting time)                                                 | Enzymatic, CHOD-PAP (average 4-hour fasting time)                                                                                                 |
| FR02         | Direct, polyethylene glycol-modified enzyme (PEG) (average 4-hour fasting time)                                                                                                                                                             | LDL cholesterol was calculated using Friedewald's formula, Average 4-hour fasting time.          | Enzymatic, GPO-PAP (average 4-hour fasting time)                                                 | Enzymatic, CHOD-PAP (average 4-hour fasting time)                                                                                                 |
| FR07         | Accelerator selective detergent                                                                                                                                                                                                             | Lipid Selective Detergent                                                                        | Enzymatic, GPO                                                                                   | Enzymatic, CHOD-PAP                                                                                                                               |
| GOSH         | Reference method at Karolinska Institutet                                                                                                                                                                                                   | Reference method at Karolinska Institutet                                                        | Reference method at Karolinska Institutet                                                        | Reference method at Karolinska Institutet                                                                                                         |
| GRAPHIC      | Abbott Aeroset 2.0 Analyser                                                                                                                                                                                                                 | Abbott Aeroset 2.0 Analyser                                                                      | Abbott Aeroset 2.0 Analyser                                                                      | Abbott Aeroset 2.0 Analyser                                                                                                                       |
| H2000        | HDL-C Plus (4-11 hour fasting time)                                                                                                                                                                                                         | LDL-C Plus (4-11 hour fasting time)                                                              | Triglycerides, GPO PAP (4-11 hour fasting time)                                                  | Cholesterol, CHOD PAP (4-11 hour fasting time)                                                                                                    |
| HELENA       | Enzyme assays on the Dimension RxL clinical chemistry system (Dade Behring, Schwalbach, Germany) .                                                                                                                                          | Enzyme assays on the Dimension RxL clinical chemistry system (Dade Behring, Schwalbach, Germany) | Enzyme assays on the Dimension RxL clinical chemistry system (Dade Behring, Schwalbach, Germany) | Enzyme assays on the Dimension RxL clinical chemistry system (Dade Behring, Schwalbach, Germany) .                                                |
| KORA F3      | AHDL Flex method (Dade-Behring)                                                                                                                                                                                                             | Direct method (ALDL, Dade-Behring).                                                              | TGL Flex (Dade-Behring),                                                                         | cholesterol-esterase method (CHOL Flex, Dade-Behring)                                                                                             |
| KORA F4      | AHDL Flex method (Dade-Behring)                                                                                                                                                                                                             | Direct method (ALDL, Dade-Behring).                                                              | TGL Flex (Dade-Behring),                                                                         | cholesterol-esterase method (CHOL Flex, Dade-Behring)                                                                                             |
| MONA LISA    | HDL-cholesterol was measured after sodium phosphotungstate/magnesium chloride precipitation (Olympus).                                                                                                                                      | Friedewald formula                                                                               | Triglycerides were measured with enzyme assays (Olympus).                                        | Total cholesterol levels were measured with enzyme assays (Olympus).                                                                              |
| MONICA       | HDL- cholesterol was measured after sodium phosphotungstate/magnesium chloride precipitation (Boehringer Mannheim, Mannheim, Germany).                                                                                                      | Friedewald formula                                                                               | Triglyceride levels were measured using enzyme assays (Boehringer Mannheim, Mannheim, Germany).  | Cholesterol levels were measured using enzyme assays (Boehringer Mannheim, Mannheim, Germany).                                                    |
| MORGAM       | HDL- cholesterol was measured after phosphotungstate/magnesium chloride precipitation:<br><a href="http://www.thl.fi/publications/morgam/qa/baseline/chol/table9.htm">http://www.thl.fi/publications/morgam/qa/baseline/chol/table9.htm</a> | Calculated using Friedewald's formula.                                                           | Enzymatic                                                                                        | <a href="http://www.thl.fi/publications/morgam/qa/baseline/chol/table9.htm">http://www.thl.fi/publications/morgam/qa/baseline/chol/table9.htm</a> |

SUPPLEMENTARY DATA

|                |                                                                                                                                                         |                                                                                                                                                                                                                                                                                                |                                                                                                                                        |                                                                                                                                           |
|----------------|---------------------------------------------------------------------------------------------------------------------------------------------------------|------------------------------------------------------------------------------------------------------------------------------------------------------------------------------------------------------------------------------------------------------------------------------------------------|----------------------------------------------------------------------------------------------------------------------------------------|-------------------------------------------------------------------------------------------------------------------------------------------|
| MPP            | routine methods at the Department of Clinical Chemistry, University Hospital                                                                            |                                                                                                                                                                                                                                                                                                | routine methods at the Department of Clinical Chemistry, University Hospital                                                           | routine methods at the Department of Clinical Chemistry, University Hospital                                                              |
| NESDA          | Enzymatic colorimetric assay (HDL-C plus) (Modular analytics, Roche diagnostics, Mannheim, Germany)                                                     | LDL cholesterol was calculated using Friedewald's formula (only if triglycerides < 5.0mmol/L)                                                                                                                                                                                                  | Enzymatic colorimetric assay (GPO-PAP) (Modular analytics, Roche diagnostics, Mannheim, Germany)                                       | Enzymatic colorimetric assay (CHOD-PAP) (Modular analytics, Roche diagnostics, Mannheim, Germany)                                         |
| NFBC1966       |                                                                                                                                                         | Serum LDL was calculated by the Friedewald formula if the serum TG level was less than 354 mg/dL; if the TG level was greater than equal 354 mg/dL, LDL was determined by precipitating LDL-lipoproteins with heparin and measuring cholesterol in the liquid phase and subtracting it from TC | Fasting serum triglycerides were determined using an Hitachi 911 automatic analyzer and commercial reagents (Roche, Mannheim, Germany) | Fasting serum total cholesterol was determined using an Hitachi 911 automatic analyzer and commercial reagents (Roche, Mannheim, Germany) |
| NFBC1986       | High-density lipoprotein (HDL)-cholesterol concentrations were analysed by Cobas Integra 700 automatic analyser (Roche Diagnostics, Basel, Switzerland) | Low-density lipoprotein (LDL)-cholesterol concentrations were analysed by Cobas Integra 700 automatic analyser (Roche Diagnostics, Basel, Switzerland)                                                                                                                                         | Triglyceride concentrations were analysed by Cobas Integra 700 automatic analyser (Roche Diagnostics, Basel, Switzerland)              | Serum total cholesterol concentrations were analysed by Cobas Integra 700 automatic analyser (Roche Diagnostics, Basel, Switzerland)      |
| NTR            | Vitros 250 direct HDL cholesterol assay (Johnson & Johnson, Rochester, USA; measured in heparin plasma)                                                 | LDL cholesterol was calculated using Friedewald's formula                                                                                                                                                                                                                                      | Vitros 250 Triglycerides assay (Johnson & Johnson, Rochester, USA; measured in heparin plasma)                                         | Vitros 250 total cholesterol assay (Johnson & Johnson, Rochester, USA; measured in heparin plasma)                                        |
| PIVUS          | Reference method at Uppsala University Hospital                                                                                                         | Reference method at Uppsala University Hospital                                                                                                                                                                                                                                                | Reference method at Uppsala University Hospital                                                                                        | Reference method at Uppsala University Hospital                                                                                           |
| PPP            | Enzymatic method (Konelab 60i analyser; Thermo Electron Oy, Vantaa, Finland)                                                                            | Friedewald formula                                                                                                                                                                                                                                                                             | Enzymatic method (Konelab 60i analyser; Thermo Electron Oy, Vantaa, Finland)                                                           | Enzymatic method (Konelab 60i analyser; Thermo Electron Oy, Vantaa, Finland)                                                              |
| QIMR-AUSTRALIA | Direct Assay, Roche Cholesterol Oxidase                                                                                                                 | Friedewald formula                                                                                                                                                                                                                                                                             | Enzymatic, Roche Method                                                                                                                | Enzymatic, Roche Method                                                                                                                   |
| RS             | HDL-c was determined enzymatically, using an automated procedure                                                                                        | LDL cholesterol was calculated using Friedewald's formula                                                                                                                                                                                                                                      | Triglycerides were determined enzymatically, using an automated procedure                                                              | Total cholesterol was determined enzymatically, using an automated procedure                                                              |
| TWINGENE       | Reference method at Karolinska Institutet                                                                                                               | Reference method at Karolinska Institutet                                                                                                                                                                                                                                                      | Reference method at Karolinska Institutet                                                                                              | Reference method at Karolinska Institutet                                                                                                 |
| TwinsUK        | precipitation with magnesium chloride/phosphotungstate and thereafter as TC                                                                             | LDL cholesterol was calculated using Friedewald's formula                                                                                                                                                                                                                                      | colorimetric enzymatic method                                                                                                          | colorimetric enzymatic method                                                                                                             |
| ULSAM          | precipitation with magnesium chloride/phosphotungstate and thereafter as TC                                                                             | LDL cholesterol was calculated using Friedewald's formula                                                                                                                                                                                                                                      | Enzymatic techniques using IL Test Cholesterol Trinders's Method and IL Test Enzymatic-colorimetric Method                             | Enzymatic techniques using IL Test Cholesterol Trinders's Method and IL Test Enzymatic-colorimetric Method                                |
| WTCCC-CAD      | Abbott Aeroset 2.0 Analyser                                                                                                                             | Abbott Aeroset 2.0 Analyser                                                                                                                                                                                                                                                                    | Abbott Aeroset 2.0 Analyser                                                                                                            | Abbott Aeroset 2.0 Analyser                                                                                                               |

SUPPLEMENTARY DATA

**Supplementary Table 6.** Measurement methods used for inflammation and liver markers

| Study        | Alanine aminotransferase (ALT)                                                                                                                                 | Gamma-glytamyI-transferase (GGT)                                                                                                               | Interleukine-6                                                                                                                             | CRP                                                                                                                                                                                          |
|--------------|----------------------------------------------------------------------------------------------------------------------------------------------------------------|------------------------------------------------------------------------------------------------------------------------------------------------|--------------------------------------------------------------------------------------------------------------------------------------------|----------------------------------------------------------------------------------------------------------------------------------------------------------------------------------------------|
| B58C         | NA                                                                                                                                                             | NA                                                                                                                                             | NA                                                                                                                                         | Nephelometry using latex particles coated with monoclonal human anti-CRP, analysed by BN Prospec protein analyser                                                                            |
| EGCUT_metabo | NA                                                                                                                                                             | NA                                                                                                                                             | NA                                                                                                                                         | NA                                                                                                                                                                                           |
| EGCUT_omni   | NA                                                                                                                                                             | NA                                                                                                                                             | NA                                                                                                                                         | NA                                                                                                                                                                                           |
| FTC          | NA                                                                                                                                                             | NA                                                                                                                                             | NA                                                                                                                                         | NA                                                                                                                                                                                           |
| FR92         | NA                                                                                                                                                             | GGT was determined using a kinetic method (J.T. Baker Chemicals B.V., Denventer, Holland or Oy Medix Biochemica Ab, Kauniainen, Finland)       | NA                                                                                                                                         | CRP was determined from serum by latex immunoassay CRP16 (Abbott, Architect c8000, Abbott Laboratories, Chicago, IL). The intra-assay and inter-assay CVs were 0.83% and 0.93%, respectively |
| FR97         | NA                                                                                                                                                             | GGT was determined using a kinetic method (J.T. Baker Chemicals B.V., Denventer, Holland or Oy Medix Biochemica Ab, Kauniainen, Finland)       | NA                                                                                                                                         | CRP was determined from serum by latex immunoassay CRP16 (Abbott, Architect c8000, Abbott Laboratories, Chicago, IL). The intra-assay and inter-assay CVs were 0.83% and 0.93%, respectively |
| FR02         | NA                                                                                                                                                             | kinetic method (ECCLS, ThermoElektron Oy, Finland)                                                                                             | NA                                                                                                                                         | immunoturbidometric method sensitized to low concentration range (Orion Diagnostica, Finland)                                                                                                |
| FR07         | NA                                                                                                                                                             | kinetic method (Abbott Laboratories, Abbott Park, Illinois, U.S.A)                                                                             | NA                                                                                                                                         | latex-immunoturbidometric method (Sentinel Diagnostics, Milan, Italy).                                                                                                                       |
| GOSH         | NA                                                                                                                                                             | Reference method at Karolinska Institutet                                                                                                      | NA                                                                                                                                         | Reference method at Karolinska Institutet                                                                                                                                                    |
| GRAPHIC      | NA                                                                                                                                                             | NA                                                                                                                                             | NA                                                                                                                                         | NA                                                                                                                                                                                           |
| H2000        | NA                                                                                                                                                             | NA                                                                                                                                             | NA                                                                                                                                         | NA                                                                                                                                                                                           |
| HELENA       | Serum alanine aminotransferase levels were measured on the Dimension RxL clinical chemistry system (Dade Behring, Schwalbach, Germany) with enzymatic methods. | Serum gamma GT levels were measured on the Dimension RxL clinical chemistry system (Dade Behring, Schwalbach, Germany) with enzymatic methods. | IL-6 secretion was measured in the cell culture media by cytometric bead array and detected by flow cytometry (Facsan, BD, Sunnyvale, CA). | CRP was measured in serum by immunoturbidimetry (AU2700 biochemistry analyzer; Olympus, Watford, UK).                                                                                        |

SUPPLEMENTARY DATA

|                |                                                                                                                       |                                                                                                                              |                                                                                                                                                                    |                                                                                                                                                    |
|----------------|-----------------------------------------------------------------------------------------------------------------------|------------------------------------------------------------------------------------------------------------------------------|--------------------------------------------------------------------------------------------------------------------------------------------------------------------|----------------------------------------------------------------------------------------------------------------------------------------------------|
| KORA F3        | UV test; IFCC with pyridoxal phosphate activation (Roche/Hitachi cobas)                                               | Enzymatic calorimetric assay; HiCo Gamma-glutamyltransferase liquid (Roche/Hitachi cobas) against IFCC                       | Sandwich ELISA (CLB, Amsterdam, The Netherlands)                                                                                                                   | CRP was measured with nephelometry using latex particles coated with monoclonal human anti-CRP, analyzed on a BNII from Siemens, Eschborn, Germany |
| KORA F4        | UV test; IFCC with pyridoxal phosphate activation (Roche/Hitachi cobas)                                               | Enzymatic calorimetric assay; HiCo Gamma-glutamyltransferase liquid (Roche/Hitachi cobas) against IFCC                       | Quantikine HS ELISA kit from R&D Systems                                                                                                                           | CRP was measured with nephelometry using latex particles coated with monoclonal human anti-CRP, analyzed on a BNII from Siemens, Eschborn, Germany |
| MONA LISA      | NA                                                                                                                    | Enzymatic colorimetric assay (Olympus).                                                                                      | NA                                                                                                                                                                 | Concentrations of ultra-sensitive CRP were measured by Behring kits and nephelometry (BN Prospec, Behring Diagnostics, Westwood, MA)               |
| MONICA         | NA                                                                                                                    | Gamma GT levels were measured with enzymatic reagents on automated analyser (Hitachi 912, Roche diagnostics, Meylan France). | NA                                                                                                                                                                 | NA                                                                                                                                                 |
| MORGAM         | NA                                                                                                                    | NA                                                                                                                           | NA                                                                                                                                                                 | NA                                                                                                                                                 |
| MPP            | routine methods at the Department of Clinical Chemistry, University Hospital                                          | routine methods at the Department of Clinical Chemistry, University Hospital                                                 | NA                                                                                                                                                                 | NA                                                                                                                                                 |
| NESDA          | NA                                                                                                                    | Enzymatic IFCC (Modular analytcs, Roche diagnostics, Mannheim, Germany; measured in heparin plasma)                          | IL-6 ELISA HS (Pelikine Compact ELISA, Sanquin, Amsterdam, The Netherlands; measured in plasma)                                                                    | CRP ELISA HS (Dako, Glostrup, Denmark; measured in plasma)                                                                                         |
| NFBC1966       | NA                                                                                                                    | NA                                                                                                                           | NA                                                                                                                                                                 | Serum CRP concentrations were determined by immunoenzymometric assay (Medix Biochemica, Espoo, Finland)                                            |
| NFBC1986       | NA                                                                                                                    | NA                                                                                                                           | NA                                                                                                                                                                 | Serum CRP concentrations were determined by immunoenzymometric assay (Medix Biochemica, Espoo, Finland)                                            |
| NTR            | Vitros ALT assay (Johnson & Johnson, Rochester, USA; measured in heparin plasma)                                      | Vitros GGT assay (Johnson & Johnson, Rochester, USA; measured in heparin plasma)                                             | Quantikine human Interleukine-6 kit (R&D systems; measured in EDTA plasma)                                                                                         | Immulate 1000 CRP assay (Diagnostic Product Corporation, USA; measured in heparin plasma)                                                          |
| PIVUS          | Reference method at Uppsala University Hospital                                                                       | Reference method at Uppsala University Hospital                                                                              | Evidence® array biochip analyser (Randox Laboratories Ltd, Crumlin, UK)                                                                                            | Ultra sensitive particle enhanced immunoturbidimetric assay (Orion Diagnostica, Espoo, Finland)                                                    |
| PPP            | Local laboratories                                                                                                    | NA                                                                                                                           | NA                                                                                                                                                                 | NA                                                                                                                                                 |
| QIMR-AUSTRALIA | Roche, IFCC Method                                                                                                    | Roche, IFCC Method                                                                                                           | NA                                                                                                                                                                 | NA                                                                                                                                                 |
| RS             | Automated biochemistry spectrophotometric analyzer (ELAN-Fully Selective Analyzer, Eppendorf-Merck, Hamburg, Germany) | Automated biochemistry spectrophotometric analyzer (ELAN-Fully Selective Analyzer, Eppendorf-Merck, Hamburg, Germany)        | enzyme immuno assays according to the instructions of the manufacture (Medgenix, Amersfoort, the Netherlands). The lower detection limit of the assay was 3 pg/ml. | Rate Near Infrared Particle Immunoassay (Image® Immunochemistry System, Beckman Coulter, USA).                                                     |

SUPPLEMENTARY DATA

|           |                                                                                                          |                                                                                                          |                                                              |                                                                                                                                                                                                    |
|-----------|----------------------------------------------------------------------------------------------------------|----------------------------------------------------------------------------------------------------------|--------------------------------------------------------------|----------------------------------------------------------------------------------------------------------------------------------------------------------------------------------------------------|
| TWINGENE  | NA                                                                                                       | NA                                                                                                       | NA                                                           | Reference method at Karolinska Institutet, half of the cohort analyzed with "high-sensitive" assay. Models adjusted for 2 different methods                                                        |
| TwinsUK   | kinetic rate method on a Synchron LX20 automated multi channel analyzer (Beckman Coulter, Fullerton, CA) | kinetic rate method on a Synchron LX20 automated multi channel analyzer (Beckman Coulter, Fullerton, CA) | hIL-6 Ultra-Sensitivity ELISA (BioSource, Nivelles, Belgium) | Human Cardiovascular Disease (CVD) Panel 2 (acute-phase proteins) LINCOpex Kit (HCVD2-67BK) from Linco (Millipore) and with the Extracellular Protein Buffer Reagent Kit (LHB0001) from Invitrogen |
| ULSAM     | Greiner 300 analyser, enzymatic method                                                                   | NA                                                                                                       | IL-6 ELISA HS, R&D Systems, Minneapolis, MN                  | Latex enhanced reagent;Behring BN ProSpec analyzer                                                                                                                                                 |
| WTCCC-CAD | NA                                                                                                       | NA                                                                                                       | NA                                                           | NA                                                                                                                                                                                                 |

SUPPLEMENTARY DATA

**Supplementary Table 7.** *FTO* analysis: Instrumental variable analysis of the association of adiposity with cardiovascular risk factors<sup>a</sup>, non-stratified analysis.

|                          | <b>IV analysis (<i>FTO</i>)</b> |                    |          |
|--------------------------|---------------------------------|--------------------|----------|
|                          | n                               | $\beta$ (95%CI)    | <i>P</i> |
| Diastolic blood pressure | 115,891                         | 0.17(0.06-0.27)    | 0.002    |
| Systolic blood pressure  | 116,443                         | 0.21(0.10-0.31)    | 7.3E-05  |
| Fasting glucose          | 67,589                          | 0.05(-0.13-0.22)   | 0.60     |
| 2-h-post-OGTT-glucose    | 21,747                          | 0.24(-0.01-0.50)   | 0.06     |
| HbA1c                    | 29,173                          | 0.17(-0.04-0.38)   | 0.11     |
| ln Fasting insulin       | 39,023                          | 0.41(0.22-0.59)    | 1.8E-05  |
| ln C-reactive protein    | 72,055                          | 0.24(0.11-0.38)    | 0.001    |
| ln Interleukin-6         | 11,789                          | 0.02(-0.30-0.34)   | 0.92     |
| HDL-cholesterol          | 97,482                          | -0.22(-0.34--0.09) | 0.001    |
| LDL-cholesterol          | 91,054                          | 0.08(-0.06-0.23)   | 0.26     |
| Total cholesterol        | 111,903                         | 0.06(-0.07-0.20)   | 0.35     |
| ln Triglycerides         | 105,867                         | 0.25(0.11-0.39)    | 0.001    |
| ln ALT                   | 50,202                          | 0.29(0.12-0.45)    | 0.001    |
| ln GGT                   | 77,023                          | 0.24(0.12-0.36)    | 4.0E-04  |

<sup>a</sup>All models were adjusted for sex and age.

Abbreviations:  $\beta$  (95% CI), effect per standard deviation change of BMI on trait (SD-scale); OGTT, oral glucose tolerance test; ALT, alanine aminotransferase; GGT, gamma-glutamyl-transferase; HDL-cholesterol, high-density lipoprotein cholesterol; LDL-cholesterol, low-density lipoprotein cholesterol; ln, transformed to natural logarithm scale

SUPPLEMENTARY DATA

**Supplementary Table 8. *FTO* analysis: Age-stratified instrumental variable analysis of the association of adiposity with cardiovascular risk factors<sup>a</sup>.**

| IV analysis ( <i>FTO</i> ) |           |                              |          |           |                               |          |                         |
|----------------------------|-----------|------------------------------|----------|-----------|-------------------------------|----------|-------------------------|
|                            | <55 years |                              |          | ≥55 years |                               |          |                         |
|                            | n         | β (95%CI)                    | <i>P</i> | n         | β (95%CI)                     | <i>P</i> | <i>P<sub>diff</sub></i> |
| Diastolic blood pressure   | 70,409    | 0.23(0.10-0.36)              | 4.0E-04  | 46,595    | 0.06(-0.10-0.22) <sup>b</sup> | 0.48     |                         |
| Systolic blood pressure    | 70,574    | 0.21(0.10-0.32)              | 2.0E-04  | 46,982    | 0.20(0.02-0.38)               | 0.03     |                         |
| Fasting glucose            | 43,714    | 0.03(-0.17-0.23)             | 0.79     | 24,813    | 0.04(-0.26-0.34)              | 0.80     |                         |
| 2-h-post-OGTT-glucose      | 13,591    | 0.25(0.02-0.49)              | 0.04     | 8,156     | 0.27(-0.25-0.80)              | 0.31     |                         |
| HbA1c                      | 14,792    | 0.14(-0.13-0.41)             | 0.31     | 14,152    | 0.15(-0.15-0.46)              | 0.33     |                         |
| ln Fasting insulin         | 25,334    | 0.41(0.19-0.63) <sup>b</sup> | 3.0E-04  | 14,583    | 0.36(0.06-0.66)               | 0.02     |                         |
| ln C-reactive protein      | 42,058    | 0.30(0.13-0.47)              | 7.0E-04  | 29,981    | 0.15(-0.11-0.40)              | 0.25     |                         |
| ln Interleukin-6           | 6,719     | -0.26(-0.91-0.40)            | 0.44     | 5,070     | 0.17(-0.31-0.65)              | 0.48     |                         |
| HDL-cholesterol            | 61,034    | -0.27(-0.41--0.13)           | 1.0E-04  | 37,183    | -0.14(-0.32-0.04)             | 0.12     |                         |
| LDL-cholesterol            | 59,591    | 0.22(0.08-0.36)              | 0.002    | 32,468    | -0.13(-0.38-0.12)             | 0.30     | 0.01                    |
| Total cholesterol          | 72,804    | 0.18(0.04-0.31)              | 0.01     | 40,112    | -0.12(-0.32-0.08)             | 0.26     | 0.02                    |
| ln Triglycerides           | 71,842    | 0.33(0.15-0.50)              | 2.0E-04  | 35,060    | 0.07(-0.13-0.28)              | 0.48     |                         |
| ln ALT                     | 31,850    | 0.27(0.01-0.52)              | 0.04     | 18,352    | 0.18(-0.05-0.42)              | 0.13     |                         |
| ln GGT                     | 51,205    | 0.23(0.09-0.37)              | 0.001    | 25,818    | 0.23(-0.03-0.50)              | 0.08     |                         |

<sup>a</sup>All models were adjusted for sex and age.

<sup>b</sup>Significant difference ( $P < 0.05$ ) between IV analysis and observational analysis.

Abbreviations: β (95% CI), effect per standard deviation change of BMI on trait (SD-scale); *P<sub>diff</sub>*, difference between age strata (only significant P-values are shown); OGTT, oral glucose tolerance test; ALT, alanine aminotransferase; GGT, gamma-glutamyl transferase; HDL-cholesterol, high-density lipoprotein cholesterol; LDL-cholesterol, low-density lipoprotein cholesterol; ln, transformed to natural logarithm scale

SUPPLEMENTARY DATA

**Supplementary Table 9.** *FTO* analysis: Sex-stratified instrumental variable analysis of the association of adiposity with cardiovascular risk factors<sup>a</sup>.

| IV analysis ( <i>FTO</i> ) |        |                                |          |        |                    |          |                          |
|----------------------------|--------|--------------------------------|----------|--------|--------------------|----------|--------------------------|
|                            | Women  |                                |          | Men    |                    |          | <i>P</i> <sub>diff</sub> |
|                            | n      | β (95%CI)                      | <i>P</i> | n      | β (95%CI)          | <i>P</i> |                          |
| Diastolic blood pressure   | 59,581 | 0.08(-0.05-0.21) <sup>b</sup>  | 0.20     | 56,310 | 0.26(0.09-0.42)    | 0.002    |                          |
| Systolic blood pressure    | 59,702 | 0.15(0.02-0.28)                | 0.02     | 56,741 | 0.28(0.11-0.45)    | 0.001    |                          |
| Fasting glucose            | 35,589 | 0.03(-0.18-0.24)               | 0.81     | 32,000 | 0.11(-0.18-0.41)   | 0.45     |                          |
| 2-h-post-OGTT-glucose      | 10,032 | 0.28(-0.17-0.72)               | 0.22     | 11,715 | 0.28(-0.03-0.58)   | 0.08     |                          |
| HbA1c                      | 15,635 | -0.02(-0.27-0.22)              | 0.85     | 13,538 | 0.40(0.05-0.75)    | 0.02     |                          |
| ln Fasting insulin         | 21,962 | 0.19(-0.03-0.42) <sup>b</sup>  | 0.09     | 17,061 | 0.70(0.38-1.02)    | 1.8E-05  | 0.011                    |
| ln C-reactive protein      | 40,143 | 0.22(-0.01-0.45)               | 0.06     | 31,912 | 0.24(0.03-0.45)    | 0.02     |                          |
| ln Interleukin-6           | 6,652  | -0.12(-0.53-0.30)              | 0.58     | 5,137  | 0.19(-0.38-0.76)   | 0.52     |                          |
| HDL-cholesterol            | 52,991 | -0.12(-0.27-0.03) <sup>b</sup> | 0.12     | 44,464 | -0.34(-0.53--0.14) | 8.0E-04  |                          |
| LDL-cholesterol            | 50,604 | 0.12(-0.06-0.30)               | 0.21     | 40,450 | 0.04(-0.18-0.27)   | 0.71     |                          |
| Total cholesterol          | 58,238 | 0.08(-0.08-0.25)               | 0.32     | 53,665 | 0.03(-0.19-0.24)   | 0.82     |                          |
| ln Triglycerides           | 55,885 | 0.21(0.05-0.36)                | 0.01     | 49,982 | 0.29(0.08-0.50)    | 0.01     |                          |
| ln ALT                     | 26,849 | 0.18(-0.08-0.43)               | 0.18     | 23,353 | 0.39(0.13-0.64)    | 0.003    |                          |
| ln GGT                     | 41,138 | 0.25(0.09-0.40)                | 0.001    | 35,885 | 0.21(0.01-0.41)    | 0.04     |                          |

<sup>a</sup>All models were adjusted for age.

<sup>b</sup>Significant difference (*P*<0.05) between IV analysis and observational analysis.

Abbreviations: *P*<sub>diff</sub>, difference between women and men (only significant *P*-values are shown); OGTT, oral glucose tolerance test; ALT, alanine aminotransferase; GGT, gamma-glutamyl transferase; HDL-cholesterol, high-density lipoprotein cholesterol; LDL-cholesterol, low-density lipoprotein cholesterol; ln, transformed to natural logarithm scale
